# Supplementary material
Source: PubMed Central journal article supplement (PMC8610426)

# THE LANCET

## Infectious Diseases

### Supplementary appendix

This appendix formed part of the original submission and has been peer reviewed. We post it as supplied by the authors.

Supplement to: Kremsner PG, Guerrero RAA, Arana-Arri E, et al. Efficacy and safety of the CVnCoV SARS-CoV-2 mRNA vaccine candidate in ten countries in Europe and Latin America (HERALD): a randomised, observer-blinded, placebo-controlled, phase 2b/3 trial. *Lancet Infect Dis* 2021; published online Nov 23. [https://doi.org/10.1016/S1473-3099\(21\)00677-0](https://doi.org/10.1016/S1473-3099(21)00677-0).

## Appendix

Supplement to:

Kremsner PG, et al. Efficacy and safety of the CVnCoV SARS-CoV-2 mRNA vaccine candidate: results from HERALD, a phase 2b/3, randomised, observer-blinded, placebo-controlled clinical trial in ten countries in Europe and Latin America. *Lancet Infectious Diseases*...

**Table of contents**

Herald Study Group: members (by country and study centre) ..... 3

Criteria for study participation..... 4

    Inclusion criteria..... 4

    Exclusion criteria ..... 4

Table S1 Severity of solicited local reactions ..... 5

Table S2 Severity of solicited systemic reactions..... 5

Table S3 Adverse events of special interest – potential immune-mediated diseases..... 6

Table S4 Adverse events of special interest for SARS-CoV-2 vaccines ..... 7

Table S5 Summary of reasons for discontinuing treatment or the study ..... 7

Table S6 List of study endpoints, including endpoints not included those that will be analysed at study end ..... 8

Table S7 SARS-CoV-2 variants sequenced in the efficacy analysis set during the HERALD clinical trial ..... 9

Table S8 Solicited local and systemic adverse events in the Phase 2b reactogenicity analysis set ..... 10

Figure S1 Trial profile for the phase 2b part of the trial ..... 11

### **Herald Study Group: members (by country and study centre)**

**Argentina:** AR001 (Sanatorio Parque): Luciano Lovesio MD, Fabián Díez MD, Franco Grazziani MD; AR002 (Hospital Interzonal General de Agudos Vicente Lopez y Planes): María Cristina Ganaha MD, Viviana Judith Zalatnik MD, Ricardo Julio Dittrich MD; AR003 (Hospital Zonal General de Agudos Descentralizado Evita Pueblo de Berazategui): Lidia Espínola MD, Sandra Lambert MD, Andrea Longhi MD; AR004 (Hospital Interzonal General Agudos Prof. Dr. Ramon Carrillo): Claudia Vecchio MD, María Mastruzzo MD; AR005 (Instituto de Investigaciones Clínicas Quilmes): Alberto Fernandez MD, Silvana Borchowiek MD, Roberto Potito MD; AR006 (Corporación Médica Sanatorio) Fernando Rodolfo Andres Ahuad Guerrero MD, Fernando Martin Guardiani MD, Sofia Castella MD, Monica Foccoli MD; AR007 (Instituto De Investigaciones Clinica Zarate): Aldana Pedernera MD, Ariel Braida MD, Virginia Durigan MD, Carolina Martella MD; AR008 (Instituto de Investigaciones Clínicas Mar del Plata): Antonela Bobat MD, Bruno Emilio Boggia MD, Sergio Andrés Nemi MD; AR009 (Fundación CENIT Para la Investigación en Neurociencias): Javier Tartaglione MD, Fabián César Piedimonte MD; **Belgium:** BE001 (Universitair Ziekenhuis Gent): Felke Steijns PhD, Azhar Alhatemi MD, Jasper Joye MD; BE002 (Mensura): Kristel Willy Irma Knops MD, Jessie De Bie PhD; **Columbia:** CO001 (CAIMED - Bogota Clinical Research Center): Humberto Reynales Londoño PhD, Paula Andrea Rodríguez Ordoñez MD, Johanna Marcela García Cruz MD, Leonardo Bautista Toloza MD, Margot Cecilia Ladino González BSc, Adriana Pilar Zambrano Ochoa BSN; CO002 (Centro de Estudios en Infectología Pediátrica (CEIP)): Iñigo Prieto Pradera MD, Daniela Torres Hernandez MD, Diana Patricia Mazo Elorza PharmD, María Fernanda Collazos Lennis BSN, Beatriz Vanegas Dominguez PhD, Lina Marianur Solano Mosquera BSN; **Dominican Republic:** DO001 (Fundacion Dominicana de Perinatologia Pro Bebe): Sonia Mazara Rosario MD, Gilda Reyes MD, Laura Rivera MBA; DO002 (Instituto Dermatológico Dominicano y Cirugía de Piel 'Dr. Huberto Bogaert Díaz'): Yeycy Donastorg MD, Flavia Lantigua MD; DO003 (Hospital General Regional Marcelino Vélez Santana): Dania Torres Almanzar MD, Rosalba Candelario MBA; DO004 (Clínica Cruz Jiminian): Lourdes Peña Mendez MD, Nadia Rosario Gomez MD; **Germany:** DE001 (Universitätsklinikum Tübingen - Institut für Tropenmedizin, Reisemedizin und Humanparasitologie): Rolf Fendel PhD, Wim Alexander Fleischmann MD, Erik Koehne, Andrea Kreidenweiss PhD, Carsten Köhler MD, Meral Esen MD; DE002 (Uniklinik Köln): Carola Horn MD, Sandra Eberts MD; DE003 (Ludwig-Maximilians-Universität München): Arne Kroidl MD, Kristina Huber MD, Verena Thiel MD; **Spain:** ES001 (Hospital Clínico San Carlos): Antonio Portolés-Pérez MD, Ana Ascaso del Río MD, Leonor Laredo Velasco MD; ES002 (Hospital Universitario Donostia): María Jesus Bustinduy Odriozola MD, Igor Larrea Arranz MD, Luis Ignacio Martínez Alcorta MD, María Isabel Durán Laviña BSN; ES003 (OSI Ezkerraldea-Enkarterri-Cruces): Natale Imaz-Ayo PhD, Susana Meijide PhD, Aitor García-de-Vicuña MD, Ana Santorcuato MD, Mikel Gallego MD; **Mexico:** MX001 (Hospital Zambrano Hellion TecSalud): Gloria Mayela Aguirre-García, MD; MX002 (PanAmerican Clinical Research - Mexico Headquarters): Jocelyn Olmos Vega MD, Pablo González Limón MD, Andrea Vázquez Villar MD, Jaime Chávez Barón MD, Felipe Arredondo Saldaña MD, Juan de Dios Luján MD; MX003 (Panamerican Clinical Research Mexico, Guadalajara): Laura Julia Camacho Choza MD, Eduardo Gabriel Vázquez Saldaña MD, Sandra Janeth Ortega Dominguez MD, Karen Sofia Vega Orozco MD; MX004 (Unidad de Medicina Especializada SMA SC): Ivonne Aimee Torres Quiroz MD, Alejandro Martinez Avendaño MD, Javier Herrera Sanchez MD, Esperanza Guzman MD; MX005 (CAIMED – México): Laura Castro Castrezana MD; MX006 (Instituto Nacional de Ciencias Medicas y Nutricion Salvador Zubiran): Guillermo Miguel Ruiz Palacios y Santos MD; **The Netherlands:** NL001 (The Julius Center - Utrecht Science Park – Stratum): Ronald Frank Jacobus de Winter; NL002 (Amsterdam Universitair Medische Centra - Academisch Medisch Centrum): Hanna K de Jonge MD, Jenny L Schnyder MD; NL003 (Noordwest Ziekenhuisgroep – Alkmaar): Wim Boersma PhD, Lisa Hessels MD; NL004 (Amphia Ziekenhuis - Breda Molengracht): Remco Djamin MD, Simone van der Sar MD; **Panama:** PA001 (Centro de Vacunacion Internacional - CEVAXIN Avenida Mexico): Rodrigo DeAntonio MD, Moisés Peña MD, Gabriel Rebolon MD, Marianela Rojas MDA, Johnny Escobar PharmD; PA002 (Instituto de Investigaciones Científicas y Servicios de Alta Tecnología): Bruno Hammerschlag Icaza MD, Digna Y Wong T MD; PA003 (Centro De Vacunacion Internacional - CEVAXIN Chorreras): Paulo Barrera Perigault MD, Sergio Ruiz MD; PA004: (Centro De Vacunacion Internacional - CEVAXIN 24 Diciembre): Milagros Chan MD, Dommie Arias Hoo MD; **Peru:** PE001: (Instituto de Investigación Nutricional): Ana Gil MSc, Carlos R Celis MD, Maria Pia Balmaceda MD, Omar Flores MSc, Mayra Ochoa MSc, Bia Peña MSc; PE002 (Centro de Investigación para Ensayos Clínicos UPCH): Carolina de la Flor MD, Camille María Webb MD, Enrique Cornejo MD, Fatima Sanes MD, Valerie Mayorga MD, Gladys Valdiviezo RN; PE003 (Centro de Investigaciones Tecnológicas, Biomédicas y Medioambientales): Suzanne Pamela Ramírez Lamas MD, Gustavo Alberto Grande Castillo MD; PE004 (Asociación Civil Impacta Salud y Educación): Javier R Lama MD, Milagros Erika Matta Aguirre MD, Lesly Angela Arancibia Luna RN; PE005 (Hospital de Chancay): Óscar Carbajal Paulet MD, José Zambrano Ortiz MD; PE006 (Clinica Medica San Martin): Anais Camara MD, Fernanda Guzman Quintanilla MD; PE008 (Instituto de Investigación Nutricional - Las Gardenias): Carmen Diaz-Parra MD, Jose Morales-Oliva MD; PE009 (Instituto de Investigación Nutricional - San Carlos): Rubelio E Cornejo MD, Sheby A Ricalde MD, Jhonny Vidal MD; **CureVac:** Luis Rios Nogales, Darline Cheatham-Seitz; Giorgia Gregoraci; Alain Brex; Lisa Walz; Dominik Vahrenhorst; Tobias Seibel; Gianluca Quintini.

## Criteria for study participation

### Inclusion criteria

Participants were enrolled in this trial only if they met all of the following criteria:

1. Male or female participants 18 years of age or older.
2. Willing and able to provide written informed consent prior to initiation of any trial procedures.
3. Expected compliance with protocol procedures and availability for clinical follow-up through the last planned visit.
4. Females of non-childbearing potential, defined as follows:  
surgically sterile (history of bilateral tubal ligation/occlusion, bilateral oophorectomy or hysterectomy) or postmenopausal (defined as amenorrhea for  $\geq 12$  consecutive months prior to screening (Day 1) without an alternative medical cause).  
A follicle-stimulating hormone (FSH) level may be measured at the discretion of the Investigator to confirm postmenopausal status.
5. Females of childbearing potential: negative pregnancy test {human chorionic gonatropin {hCG}} within 24 hours prior to each trial vaccination on Day 1 and Day 29.
6. Females of childbearing potential must use highly effective methods of birth control from 2 weeks before the first administration of the trial vaccine until 3 months following the last administration.  
The following methods of birth control are considered highly effective when used consistently and correctly:
  - Combined (oestrogen and progestogen containing) hormonal contraception associated with inhibition of ovulation (oral, intravaginal or transdermal);
  - Progestogen-only hormonal contraception associated with inhibition of ovulation (oral, injectable or implantable);
  - Intrauterine devices (IUDs);
  - Intrauterine hormone-releasing systems (IUSs);
  - Bilateral tubal ligation;
  - Vasectomized partner or infertile partner;
  - Sexual abstinence, periodic abstinence (e.g., calendar, ovulation, symptothermal and post-ovulation methods) and withdrawal are not acceptable.

### Exclusion criteria

Participants were not enrolled in this trial if they met any of the following criteria:

1. History of virologically-confirmed COVID-19 illness.
2. For females: pregnancy or lactation.
3. Use of any investigational or non-registered product (vaccine or drug) within 28 days preceding the administration of the first trial vaccine or planned use during the trial.
4. Receipt of licensed vaccines within 28 days (for live vaccines) or 14 days (for inactivated or any other vaccines) prior to the administration of the first trial vaccine.
5. Prior administration of any investigational SARS-CoV-2 vaccine or another coronavirus (SARS-CoV, MERS-CoV) vaccine or planned use during the trial.
6. Any treatment with immunosuppressants or other immune-modifying drugs (including but not limited to anabolic steroids, corticosteroids, biologicals and methotrexate) for  $> 14$  days total within 6 months preceding the administration of trial vaccine or planned use during the trial. For corticosteroid use, this means prednisone or equivalent, 0.5 mg/kg/day for 14 days or more. The use of inhaled, topical, or localized injections of corticosteroids (e.g., for joint pain/inflammation) is permitted.
7. Any medically diagnosed or suspected immunosuppressive or immunodeficient condition based on medical history and physical examination including known infection with human immunodeficiency virus (HIV), hepatitis B virus (HBV) or hepatitis C virus (HCV); current diagnosis of or treatment for cancer including leukaemia, lymphoma, Hodgkin disease, multiple myeloma, or generalized malignancy; chronic renal failure or nephrotic syndrome; and receipt of an organ or bone marrow transplant.
8. History of angioedema (hereditary or idiopathic) or history of any anaphylactic reaction.
9. History of pIMD.
10. History of allergy to any component of CVnCoV vaccine.
11. Administration of immunoglobulins or any blood products within 3 months prior to the administration of trial vaccine or planned receipt during the trial.
12. Participants with a significant acute or chronic medical or psychiatric illness that, in the opinion of the Investigator, precludes trial participation (e.g., may increase the risk of trial participation, render the participant unable to meet the requirements of the trial, or may interfere with the participant's trial

evaluations). These include severe and/or uncontrolled cardiovascular disease, gastrointestinal disease, liver disease, renal disease, respiratory disease, endocrine disorder, and neurological and psychiatric illnesses. However, those with controlled and stable cases can be included in the trial.

13. Participants with impaired coagulation or any bleeding disorder in whom an intramuscular injection or a blood draw is contraindicated.
14. Foreseeable non-compliance with the trial procedures as judged by the Investigator.

**Table S1 Severity of solicited local reactions**

|                 | <b>Grade 0</b> | <b>Grade 1</b>                             | <b>Grade 2</b>                                                                        | <b>Grade 3</b>                                                        |
|-----------------|----------------|--------------------------------------------|---------------------------------------------------------------------------------------|-----------------------------------------------------------------------|
| <b>Pain</b>     | Absent         | Does not interfere with activity           | Interferes with activity and/or repeated use of non-narcotic pain reliever > 24 hours | Prevents daily activity and/or repeated use of narcotic pain reliever |
| <b>Redness</b>  | < 2.5 cm       | 2.5 – 5 cm                                 | 5.1 – 10 cm                                                                           | > 10 cm                                                               |
| <b>Swelling</b> | < 2.5 cm       | 5 cm and does not interfere with activity  | 5 – 10 cm or interferes with activity                                                 | > 10 cm or prevents daily activity                                    |
| <b>Itching</b>  | Absent         | Mild, no interference with normal activity | Moderate, some interference with normal activity                                      | Significant, prevents normal activity                                 |

Adapted from U.S. Department of Health and Human Services, Food and Drug Administration, Center for Biologics Evaluation and Research. Guidance for Industry – Toxicity Grading Scale for Healthy Adult and Adolescent Volunteers Enrolled in Preventive Vaccine Clinical Trials. September 2007

**Table S2 Severity of solicited systemic reactions**

Adapted from U.S. Department of Health and Human Services, Food and Drug Administration, Center for Biologics Evaluation and Research. Guidance for Industry – Toxicity Grading Scale for Healthy Adult and Adolescent Volunteers Enrolled in Preventive Vaccine Clinical Trials. September 2007

|                        | <b>Grade 0</b> | <b>Grade 1</b>                                                             | <b>Grade 2</b>                                                                                                | <b>Grade 3</b>                                                                |
|------------------------|----------------|----------------------------------------------------------------------------|---------------------------------------------------------------------------------------------------------------|-------------------------------------------------------------------------------|
| <b>Fever</b>           | < 38.0 °C      | ≥38.0 – 38.4°C                                                             | ≥38.5 – 38.9°C                                                                                                | ≥39.0°C                                                                       |
| <b>Headache</b>        | Absent         | Mild, no interference with normal activity                                 | Moderate, some interference with normal activity and/or repeated use of non-narcotic pain reliever > 24 hours | Significant; any use of narcotic pain reliever and/or prevents daily activity |
| <b>Fatigue</b>         | Absent         | Mild, no interference with normal activity                                 | Moderate, some interference with normal activity                                                              | Significant, prevents normal activity                                         |
| <b>Chills</b>          | Absent         | Mild, no interference with normal activity                                 | Moderate, some interference with normal activity                                                              | Significant, prevents normal activity                                         |
| <b>Myalgia</b>         | Absent         | Mild, no interference with normal activity                                 | Moderate, some interference with normal activity                                                              | Significant, prevents normal activity                                         |
| <b>Arthralgia</b>      | Absent         | Mild, no interference with normal activity                                 | Moderate, some interference with normal activity                                                              | Significant, prevents normal activity                                         |
| <b>Nausea/vomiting</b> | Absent         | Mild, no interference with normal activity and/or 1 – 2 episodes/ 24 hours | Moderate, some interference with activity and/or >2 episodes/ 24 hours                                        | Significant, prevents daily activity, requires outpatient IV hydration        |
| <b>Diarrhoea</b>       | Absent         | 2 – 3 loose stools over 24 hours                                           | 4 – 5 stools over 24 hours                                                                                    | 6 or more watery stools over 24 hours or requires outpatient IV hydration     |

**Table S3 Adverse events of special interest – potential immune-mediated diseases**

| <b>Gastrointestinal disorders:</b>                                                                                                                                                                                                                                                                                                                                                                                                                                                                                                                                                                                                                                                | <b>Neuro-inflammatory disorders:</b>                                                                                                                                                                                                                                                                                                                                                                                                                                                                                                                                                                                                                                                                                                                              |
|-----------------------------------------------------------------------------------------------------------------------------------------------------------------------------------------------------------------------------------------------------------------------------------------------------------------------------------------------------------------------------------------------------------------------------------------------------------------------------------------------------------------------------------------------------------------------------------------------------------------------------------------------------------------------------------|-------------------------------------------------------------------------------------------------------------------------------------------------------------------------------------------------------------------------------------------------------------------------------------------------------------------------------------------------------------------------------------------------------------------------------------------------------------------------------------------------------------------------------------------------------------------------------------------------------------------------------------------------------------------------------------------------------------------------------------------------------------------|
| <ul style="list-style-type: none"> <li>• Celiac disease</li> <li>• Crohn's disease</li> <li>• Ulcerative colitis</li> <li>• Ulcerative proctitis</li> </ul>                                                                                                                                                                                                                                                                                                                                                                                                                                                                                                                       | <ul style="list-style-type: none"> <li>• Acute disseminated encephalomyelitis, including site specific variants (e.g., non-infectious encephalitis, encephalomyelitis, myelitis, myeloradiculomyelitis)</li> <li>• Cranial nerve disorders, including paralyses/paresis (e.g., Bell's palsy)</li> <li>• Guillain-Barré syndrome, including Miller Fisher syndrome and other variants</li> <li>• Immune-mediated peripheral neuropathies, Parsonage-Turner syndrome and plexopathies, including chronic inflammatory demyelinating polyneuropathy, multifocal motor neuropathy, and polyneuropathies associated with monoclonal gammopathy</li> <li>• Multiple sclerosis</li> <li>• Narcolepsy</li> <li>• Optic neuritis</li> <li>• Transverse Myelitis</li> </ul> |
| <b>Liver disorders:</b>                                                                                                                                                                                                                                                                                                                                                                                                                                                                                                                                                                                                                                                           |                                                                                                                                                                                                                                                                                                                                                                                                                                                                                                                                                                                                                                                                                                                                                                   |
| <ul style="list-style-type: none"> <li>• Autoimmune cholangitis</li> <li>• Autoimmune hepatitis</li> <li>• Primary biliary cirrhosis</li> <li>• Primary sclerosing cholangitis</li> </ul>                                                                                                                                                                                                                                                                                                                                                                                                                                                                                         |                                                                                                                                                                                                                                                                                                                                                                                                                                                                                                                                                                                                                                                                                                                                                                   |
| <b>Metabolic diseases:</b>                                                                                                                                                                                                                                                                                                                                                                                                                                                                                                                                                                                                                                                        |                                                                                                                                                                                                                                                                                                                                                                                                                                                                                                                                                                                                                                                                                                                                                                   |
| <ul style="list-style-type: none"> <li>• Addison's disease</li> <li>• Autoimmune thyroiditis (including Hashimotothyroiditis)</li> <li>• Diabetes mellitus type I</li> <li>• Grave's or Basedow's disease</li> </ul>                                                                                                                                                                                                                                                                                                                                                                                                                                                              |                                                                                                                                                                                                                                                                                                                                                                                                                                                                                                                                                                                                                                                                                                                                                                   |
| <b>Skin disorders:</b>                                                                                                                                                                                                                                                                                                                                                                                                                                                                                                                                                                                                                                                            | <b>Vasculitides:</b>                                                                                                                                                                                                                                                                                                                                                                                                                                                                                                                                                                                                                                                                                                                                              |
| <ul style="list-style-type: none"> <li>• Alopecia areata</li> <li>• Autoimmune bullous skin diseases, including pemphigus, pemphigoid and dermatitis herpetiformis</li> <li>• Cutaneous lupus erythematosus</li> <li>• Erythema nodosum</li> <li>• Morphea</li> <li>• Lichen planus</li> <li>• Psoriasis</li> <li>• Sweet's syndrome</li> <li>• Vitiligo</li> </ul>                                                                                                                                                                                                                                                                                                               | <ul style="list-style-type: none"> <li>• Large vessels vasculitis including: giant cell arteritis such as Takayasu's arteritis and temporal arteritis</li> <li>• Medium sized and/or small vessels vasculitis including: polyarteritis nodosa, Kawasaki's disease, microscopic polyangiitis, Wegener's granulomatosis, Churg-Strauss syndrome (allergic granulomatous angiitis), Buerger's disease thromboangiitis obliterans, necrotizing vasculitis and anti-neutrophil cytoplasmic antibody (ANCA) positive vasculitis (type unspecified), Henoch- Schonlein purpura, Behcet's syndrome, leukocytoclastic vasculitis</li> </ul>                                                                                                                                |
| <b>Musculoskeletal disorders:</b>                                                                                                                                                                                                                                                                                                                                                                                                                                                                                                                                                                                                                                                 | <b>Others:</b>                                                                                                                                                                                                                                                                                                                                                                                                                                                                                                                                                                                                                                                                                                                                                    |
| <ul style="list-style-type: none"> <li>• Antisynthetase syndrome</li> <li>• Dermatomyositis</li> <li>• Juvenile chronic arthritis (including Still's disease)</li> <li>• Mixed connective tissue disorder</li> <li>• Polymyalgia rheumatic</li> <li>• Polymyositis</li> <li>• Psoriatic arthropathy</li> <li>• Relapsing polychondritis</li> <li>• Rheumatoid arthritis</li> <li>• Scleroderma, including diffuse systemic form and CREST syndrome</li> <li>• Spondyloarthritis, including ankylosing spondylitis, reactive arthritis (Reiter's Syndrome) and undifferentiated spondyloarthritis</li> <li>• Systemic lupus erythematosus</li> <li>• Systemic sclerosis</li> </ul> | <ul style="list-style-type: none"> <li>• Antiphospholipid syndrome</li> <li>• Autoimmune haemolytic anaemia</li> <li>• Autoimmune glomerulonephritis (including IgA nephropathy, glomerulonephritis</li> <li>• Rapidly progressive, membranous glomerulonephritis, membranoproliferative</li> <li>• Glomerulonephritis, and mesangioproliferative glomerulonephritis)</li> <li>• Autoimmune myocarditis/cardiomyopathy</li> <li>• Autoimmune thrombocytopenia</li> <li>• Goodpasture syndrome</li> <li>• Idiopathic pulmonary fibrosis</li> <li>• Pernicious anaemia</li> <li>• Raynaud's phenomenon</li> <li>• Sarcoidosis</li> <li>• Sjögren's syndrome</li> <li>• Stevens-Johnson syndrome</li> <li>• Uveitis</li> </ul>                                       |

**Table S4 Adverse events of special interest for SARS-CoV-2 vaccines**

Based on Brighton Collaboration via CEPI's Safety Platform for Emergency vACCines (SPEAC) Project

|                                   |                                                                                                                                                                                                                                                                                                                                                                                        |
|-----------------------------------|----------------------------------------------------------------------------------------------------------------------------------------------------------------------------------------------------------------------------------------------------------------------------------------------------------------------------------------------------------------------------------------|
| <b>Immunological disorders:</b>   | <ul style="list-style-type: none"> <li>• Anaphylaxis</li> <li>• Vasculitides</li> <li>• Vaccine-associated enhanced diseases (VAED)</li> </ul>                                                                                                                                                                                                                                         |
| <b>Respiratory disorders:</b>     | <ul style="list-style-type: none"> <li>• Acute respiratory distress syndrome</li> </ul>                                                                                                                                                                                                                                                                                                |
| <b>Cardiac disorders:</b>         | <ul style="list-style-type: none"> <li>• Acute cardiac injury including: <ul style="list-style-type: none"> <li>• Microangiopathy</li> <li>• Heart failure and cardiogenic shock</li> <li>• Stress cardiomyopathy</li> <li>• Coronary artery disease</li> <li>• Arrhythmia</li> <li>• Myocarditis, pericarditis</li> </ul> </li> </ul>                                                 |
| <b>Haematological disorders:</b>  | <ul style="list-style-type: none"> <li>• Thrombocytopenia</li> </ul>                                                                                                                                                                                                                                                                                                                   |
| <b>Coagulation disorder:</b>      | <ul style="list-style-type: none"> <li>• Deep vein thrombosis</li> <li>• Pulmonary embolus</li> <li>• Cerebrovascular stroke</li> <li>• Limb ischemia</li> <li>• Haemorrhagic disease</li> </ul>                                                                                                                                                                                       |
| <b>Renal disorders:</b>           | <ul style="list-style-type: none"> <li>• Acute kidney injury</li> </ul>                                                                                                                                                                                                                                                                                                                |
| <b>Gastrointestinal disorders</b> | <ul style="list-style-type: none"> <li>• Liver injury</li> </ul>                                                                                                                                                                                                                                                                                                                       |
| <b>Neurological disorders:</b>    | <ul style="list-style-type: none"> <li>• Generalized convulsion</li> <li>• Guillain-Barré Syndrome</li> <li>• Acute disseminated encephalomyelitis</li> <li>• Meningoencephalitis</li> <li>• Dermatologic disorder: <ul style="list-style-type: none"> <li>• Chilblain-like lesions</li> <li>• Single organ cutaneous vasculitis</li> <li>• Erythema multiforme</li> </ul> </li> </ul> |
| <b>Other:</b>                     | <ul style="list-style-type: none"> <li>• Serious local/systemic AR following immunisation</li> </ul>                                                                                                                                                                                                                                                                                   |

**Table S5 Summary of reasons for discontinuing treatment or the study**

The results are shown as n (%).

|                                                 | <b>CVnCoV<br/>N=19 783</b> | <b>Placebo<br/>N=19 746</b> |
|-------------------------------------------------|----------------------------|-----------------------------|
| Completed treatment                             | 19 437 (98.3)              | 18 498 (93.7)               |
| Discontinued treatment                          | 317 (1.6)                  | 1201 (6.1)                  |
| Adverse event                                   | 23 (0.1)                   | 18 (<0.1)                   |
| Died                                            | 2 (<0.1)                   | 4 (<0.1)                    |
| Physician decision                              | 21 (0.1)                   | 73 (0.4)                    |
| Pregnancy                                       | 5 (<0.1)                   | 9 (<0.1)                    |
| Protocol deviation                              | 9 (<0.1)                   | 14 (<0.1)                   |
| Withdrawal by subject                           | 135 (0.7)                  | 541 (2.7)                   |
| SARS-CoV-2 infection                            | 42 (0.2)                   | 63 (0.3)                    |
| Other                                           | 80 (0.4)                   | 479 (2.4)                   |
| Discontinued study                              | 397 (2.0)                  | 3534 (17.9)                 |
| Adverse event                                   | 5 (<0.1)                   | 4 (<0.1)                    |
| Subject received alternative authorised vaccine | 161 (0.8)                  | 2558 (13.0)                 |
| Physician decision                              | 11 (<0.1)                  | 17 (<0.1)                   |
| Study terminated by sponsor                     | 1 (<0.1)                   | 0                           |
| Withdrawal by subject                           | 170 (0.9)                  | 795 (4.0)                   |
| Lost to follow up                               | 29 (0.1)                   | 33 (0.2)                    |
| Other                                           | 20 (0.1)                   | 127 (0.6)                   |



**Table S6 List of study endpoints, including endpoints not included those that will be analysed at study end**

| <b>Primary Endpoints</b>                                                                                                                                                                                                                                                                                                      |                                                           |
|-------------------------------------------------------------------------------------------------------------------------------------------------------------------------------------------------------------------------------------------------------------------------------------------------------------------------------|-----------------------------------------------------------|
| <b>Primary Efficacy Endpoint</b>                                                                                                                                                                                                                                                                                              |                                                           |
| Occurrence of first episodes of virologically-confirmed {reverse transcription polymerase chain reaction (RT-PCR) positive} cases of COVID-19 of any severity meeting the case definition for the primary efficacy analysis                                                                                                   | Included in manuscript                                    |
| <b>Primary Safety Endpoints</b>                                                                                                                                                                                                                                                                                               |                                                           |
| Occurrence, intensity and relationship of medically-attended AEs collected through 6 months after the second trial vaccination in all subjects                                                                                                                                                                                | Will be done in final analysis                            |
| Occurrence, intensity and relationship of SAEs and AESIs collected through 1 year after the second trial vaccination in all subjects                                                                                                                                                                                          | Included in manuscript*                                   |
| Occurrence of fatal SAEs through 1 year after the second trial vaccination in all subjects                                                                                                                                                                                                                                    | Included in manuscript*                                   |
| Occurrence, intensity and duration of each solicited local AE within 7 days after each trial vaccination in Phase 2b subjects                                                                                                                                                                                                 | Included in manuscript                                    |
| Occurrence, intensity, duration of each solicited systemic AE within 7 days after each trial vaccination in Phase 2b subjects                                                                                                                                                                                                 | Included in manuscript                                    |
| Occurrence, intensity and relationship of unsolicited AEs occurring within 28 days after each trial vaccination in Phase 2b subjects                                                                                                                                                                                          | Included in manuscript                                    |
| Occurrence of AEs leading to vaccine withdrawal or trial discontinuation through 1 year after the second trial vaccination in all subjects                                                                                                                                                                                    | Will be done in final analysis                            |
| <b>Secondary Endpoints</b>                                                                                                                                                                                                                                                                                                    |                                                           |
| <b>Key Secondary Efficacy Endpoints</b>                                                                                                                                                                                                                                                                                       |                                                           |
| Occurrence of first episodes of virologically-confirmed (RT-PCR positive) cases of moderate to severe COVID-19 meeting the case definition for the primary efficacy analysis                                                                                                                                                  | Included in manuscript                                    |
| Occurrence of first episodes of virologically-confirmed (RT-PCR positive) severe cases of COVID-19 meeting the case definition for the primary efficacy analysis                                                                                                                                                              | Included in manuscript                                    |
| Occurrence of first episodes of virologically-confirmed (RT-PCR positive) cases of COVID-19 of any severity meeting the case definition due to infection with 'wild type' and 'UK' SARS-CoV-2 strains in SARS-CoV-2 naïve subjects                                                                                            | Will not be done as only 7 cases with wild-type infection |
| Occurrence of seroconversion to the N protein of SARS-CoV-2 $\geq 15$ days following the second trial vaccination in asymptomatic seronegative subjects                                                                                                                                                                       | Will be done in final analysis                            |
| <b>Other Secondary Efficacy Endpoints</b>                                                                                                                                                                                                                                                                                     |                                                           |
| In subjects $\geq 61$ years of age, occurrence of first episodes of virologically-confirmed (RT-PCR positive) cases of COVID-19 of any severity meeting the case definition for the primary efficacy analysis                                                                                                                 | Included in manuscript                                    |
| Occurrence of virologically-confirmed (RT-PCR positive) SARS-CoV-2 infection, with or without symptoms                                                                                                                                                                                                                        | Will be done in final analysis                            |
| BoD scores calculated based on first episodes of virologically-confirmed (RT-PCR positive) cases of COVID-19 of any severity meeting the case definition for the primary efficacy analysis                                                                                                                                    | Will be done in final analysis                            |
| Occurrence of first episodes of virologically-confirmed (RT-PCR positive) cases of COVID-19 of any severity with symptom onset at any time after the first trial vaccination                                                                                                                                                  | Will be done in final analysis                            |
| <b>Secondary Immunogenicity Endpoints (Phase 2b Immunogenicity Subset)</b>                                                                                                                                                                                                                                                    |                                                           |
| <i>SARS-CoV-2 RBD of S protein antibody responses</i><br>On Days 1, 29, 43, 57, 120, 211 and 393:<br>Serum antibodies to SARS-CoV-2 RBD of S protein.<br>Occurrence of seroconversion to SARS-CoV-2 RBD of S protein.                                                                                                         | Will be done in final analysis                            |
| <i>SARS-CoV-2 viral neutralizing antibody responses</i><br>On Days 1, 29, 43, 57, 120, 211, and 393:<br>Serum viral neutralizing antibodies to SARS-CoV-2 virus, as measured by a viral neutralizing antibody assay.<br>Occurrence of seroconversion to SARS-CoV-2 virus, as measured by a viral neutralizing antibody assay. | Will be done in final analysis                            |

\* Data analysed up to database lock (June 18 2021).

**Table S7 SARS-CoV-2 variants sequenced in the efficacy analysis set during the HERALD clinical trial**

| <u>Pangolin lineage</u> | <u>WHO label</u> | <u>Variant of concern or interest</u> |
|-------------------------|------------------|---------------------------------------|
| P.2                     |                  |                                       |
| P.1.2                   |                  |                                       |
| P.1                     | Gamma            | Variant of concern                    |
| C.37                    | Lambda           | Variant of interest                   |
| C.36                    |                  |                                       |
| B.1.623                 |                  |                                       |
| B.1.621                 | Mu               | Variant of interest                   |
| B.1.617.2               | Delta            | Variant of concern                    |
| B.1.526                 |                  |                                       |
| B.1.177                 |                  |                                       |
| B.1.1.7                 | Alpha            | Variant of concern                    |
| B.1.1.519               |                  |                                       |
| B.1.1.1                 |                  |                                       |
| B.1                     |                  |                                       |
| A.2.5                   |                  |                                       |

**Table S8 Solicited local and systemic adverse events in the Phase 2b reactogenicity analysis set**  
Solicited local and systemic adverse events were reported for 7 days following dose 1 and dose 2 using participant diaries. <sup>a</sup>in participants reporting a reaction, reported as median (IQRx) days

|                                | CVnCoV           |                  | Placebo          |                  |
|--------------------------------|------------------|------------------|------------------|------------------|
|                                | Dose 1<br>N=2003 | Dose 2<br>N=1964 | Dose 1<br>N=1978 | Dose 2<br>N=1908 |
| <b>Local adverse events</b>    |                  |                  |                  |                  |
| Pain, n (%)                    | 1502 (75.0)      | 1322 (67.3)      | 279 (14.1)       | 220 (11.6)       |
| Median duration <sup>a</sup>   |                  | 2 (1.0–3.0)      |                  | 1 (1.0–2.0)      |
| Grade 3, n (%)                 | 15 (0.7)         | 10 (0.5)         | 0                | 1 (<0.1)         |
| Median duration <sup>a</sup>   |                  | 1 (1.0–1.0)      |                  | 14 (14–14)       |
| Swelling, n (%)                | 93 (4.6)         | 82 (4.2)         | 13 (0.7)         | 6 (0.3)          |
| Median duration <sup>a</sup>   |                  | 1 (1.0–2.0)      |                  | 1 (1.0–2.0)      |
| Grade 3, n (%)                 | 1 (<0.1)         | 1 (<0.1)         | 0                | 0                |
| Median duration <sup>a</sup>   |                  | 1 (1–1)          |                  |                  |
| Redness, n (%)                 | 60 (3.0)         | 40 (2.06)        | 20 (1.0)         | 7 (0.4)          |
| Median duration <sup>a</sup>   |                  | 1 (1.0–3.0)      |                  | 14 (1.0–3.0)     |
| Grade 3, n (%)                 | 2 (<0.1)         | 0                | 0                | 0                |
| Median duration <sup>a</sup>   |                  | 1 (1–1)          |                  |                  |
| Itching, n (%)                 | 82 (4.1)         | 75 (3.8)         | 64 (3.2)         | 41 (2.1)         |
| Median duration <sup>a</sup>   |                  | 1 (1.0–2.0)      |                  | 1 (1.0–2.0)      |
| Grade 3, n (%)                 | 0                | 0                | 0                | 0                |
| Median duration <sup>a</sup>   |                  |                  |                  |                  |
| <b>Systemic adverse events</b> |                  |                  |                  |                  |
| Fatigue, n (%)                 | 1339 (66.8)      | 1283 (65.3)      | 657 (33.2)       | 474 (24.8)       |
| Median duration <sup>a</sup>   |                  | 2 (1.0–2.0)      |                  | 1 (1.0–2.0)      |
| Grade 3, n (%)                 | 154 (7.7)        | 176 (9.0)        | 26 (1.3)         | 14 (0.7)         |
| Median duration <sup>a</sup>   |                  | 1 (1.0–1.0)      |                  | 1 (1.0–2.0)      |
| Headache, n (%)                | 1269 (63.4)      | 1268 (64.6)      | 623 (31.5)       | 413 (21.6)       |
| Median duration <sup>a</sup>   |                  | 1 (1.0–2.0)      |                  | 1 (1.0–2.0)      |
| Grade 3, n (%)                 | 126 (6.3)        | 143 (7.3)        | 11 (0.6)         | 4 (0.2)          |
| Median duration <sup>a</sup>   |                  | 1 (1.0–1.0)      |                  | 1 (1.0–2.0)      |
| Myalgia, n (%)                 | 1055 (52.7)      | 976 (49.7)       | 286 (14.5)       | 165 (8.6)        |
| Median duration <sup>a</sup>   |                  | 1 (1.0–2.0)      |                  | 1 (1.0–1.0)      |
| Grade 3, n (%)                 | 57 (2.8)         | 99 (5.0)         | 6 (0.3)          | 4 (0.2)          |
| Median duration <sup>a</sup>   |                  | 1 (1.0–1.0)      |                  | 1 (1.0–1.0)      |
| Chills, n (%)                  | 708 (35.4)       | 732 (37.3)       | 111 (5.6)        | 74 (3.9)         |
| Median duration <sup>a</sup>   |                  | 1 (1.0–1.0)      |                  | 1 (1.0–1.0)      |
| Grade 3, n (%)                 | 122 (6.1)        | 135 (6.9)        | 3 (0.2)          | 1 (<0.1)         |
| Median duration <sup>a</sup>   |                  | 1 (1.0–1.0)      |                  | 1 (1.0–1.0)      |
| Arthralgia, n (%)              | 369 (18.4)       | 394 (20.1)       | 113 (5.7)        | 57 (3.0)         |
| Median duration <sup>a</sup>   |                  | 1 (1.0–2.0)      |                  | 1 (1.0–2.0)      |
| Grade 3, n (%)                 | 22 (1.1)         | 40 (2.0)         | 4 (0.2)          | 3 (0.2)          |
| Median duration <sup>a</sup>   |                  | 1 (1.0–1.0)      |                  | 1 (1.0–1.0)      |
| Fever, n (%)                   | 368 (18.4)       | 462 (23.5)       | 8 (0.4)          | 5 (0.3)          |
| Median duration <sup>a</sup>   |                  | 1 (1.0–1.0)      |                  | 1 (1.0–1.0)      |
| Grade 3, n (%)                 | 30 (1.5)         | 67 (3.4)         | 0                | 0                |
| Median duration <sup>a</sup>   |                  | 1 (1.0–1.0)      |                  |                  |
| Nausea/vomiting, n (%)         | 260 (13.0)       | 262 (13.3)       | 102 (5.2)        | 69 (3.6)         |
| Median duration <sup>a</sup>   |                  | 1 (1.0–2.0)      |                  | 1 (1.0–1.0)      |
| Grade 3, n (%)                 | 9 (0.4)          | 6 (0.3)          | 1 (<0.1)         | 0                |
| Median duration <sup>a</sup>   |                  | 1 (1.0–1.0)      |                  |                  |
| Diarrhoea, n (%)               | 246 (12.3)       | 201 (10.2)       | 142 (7.2)        | 108 (5.7)        |
| Median duration <sup>a</sup>   |                  | 1 (1.0–2.0)      |                  | 1 (1.0–1.0)      |
| Grade 3, n (%)                 | 7 (0.3)          | 5 (0.3)          | 1 (<0.1)         | 3 (0.2)          |
| Median duration <sup>a</sup>   |                  | 1 (1.0–1.0)      |                  | 1 (1.0–1.0)      |

**Figure S1 Trial profile for the phase 2b part of the trial**

<sup>a</sup>In the CVnCoV group, 13 participants were censored from the safety analysis set 2 and two were excluded from the reactogenicity analysis because diary data were missing. In the placebo group, two participants were censored from the safety analysis set 2 and eight were excluded from the reactogenicity analysis because diary data were missing.

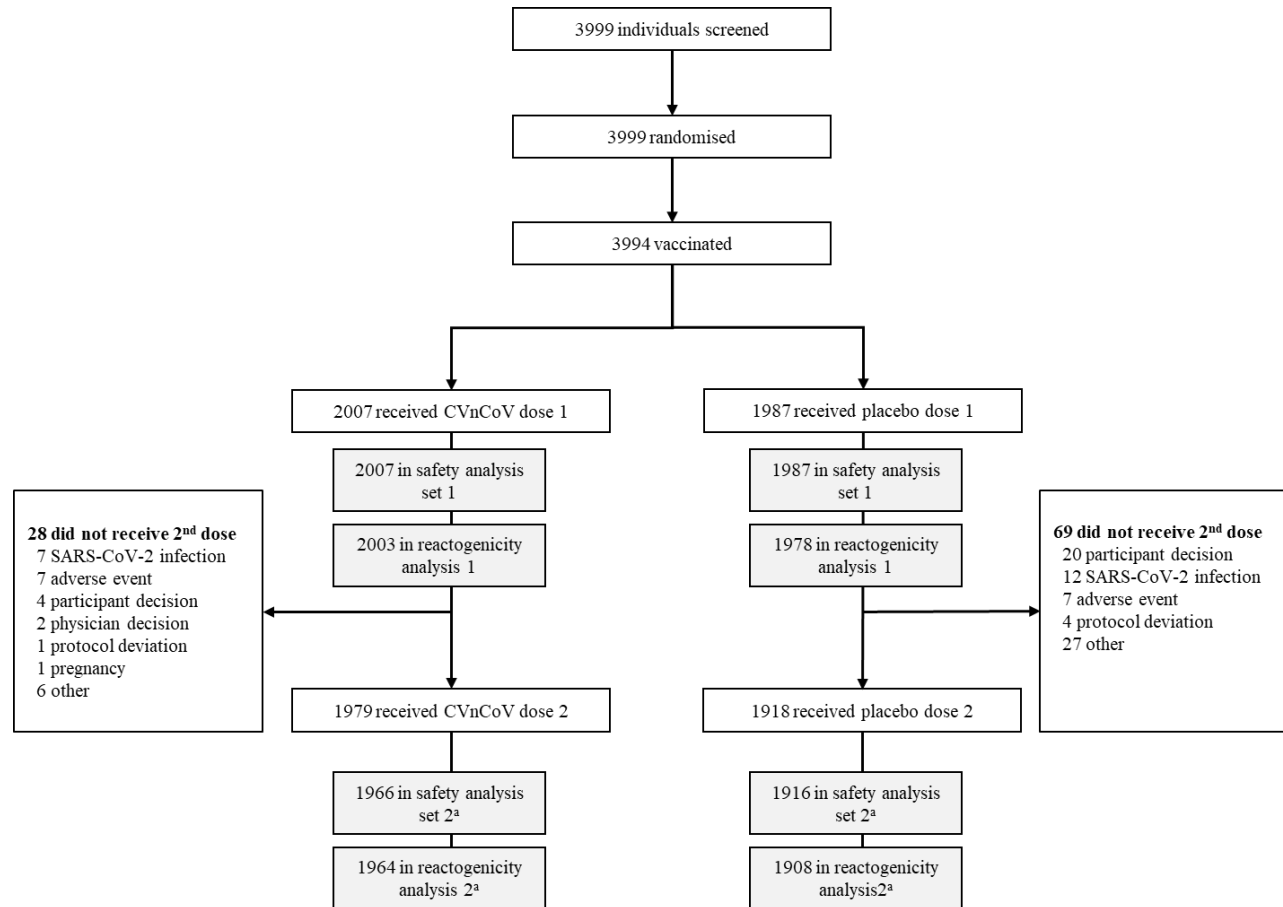

Supplement: mmc1.pdf [file mmc1.pdf]
